# Supplementary material for: Improving Rheological and Mechanical Properties of Various Virgin and Recycled Polypropylenes by Blending with Long-Chain Branched Polypropylene
Source: MDPI journal article supplement (doi:10.3390/polym13071137), 2021-04-02
Supplement: s1 [file s1]

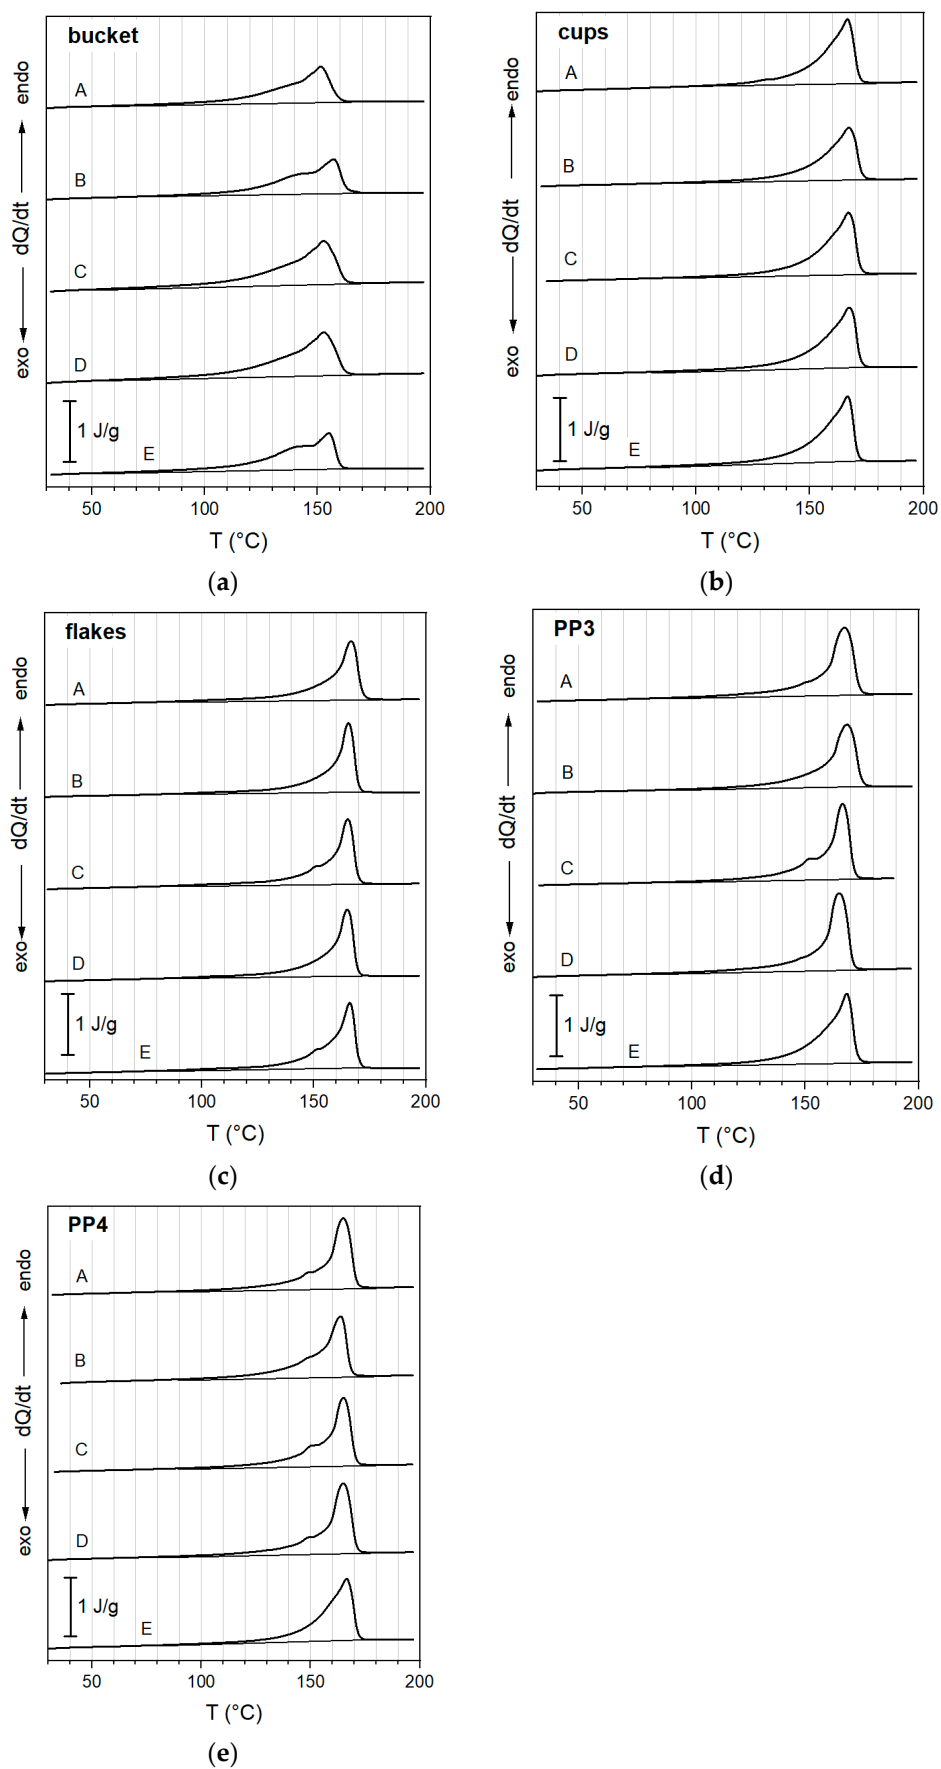

Figure S1: DSC curves of the second heating of the investigated materials; (a) PP3, (b) PP4, (c) flakes of coffee caps, (d) flakes of yoghurt cups, (e) flakes of buckets
